# Supplementary material for: Global response of upper-level aviation turbulence from various sources to climate change
Source: Springer Nature journal article supplement (doi:10.1038/s41612-023-00421-3), 2023-07-14
Supplement: 41612_2023_421_MOESM1_ESM.pdf [file 41612_2023_421_MOESM1_ESM.pdf]

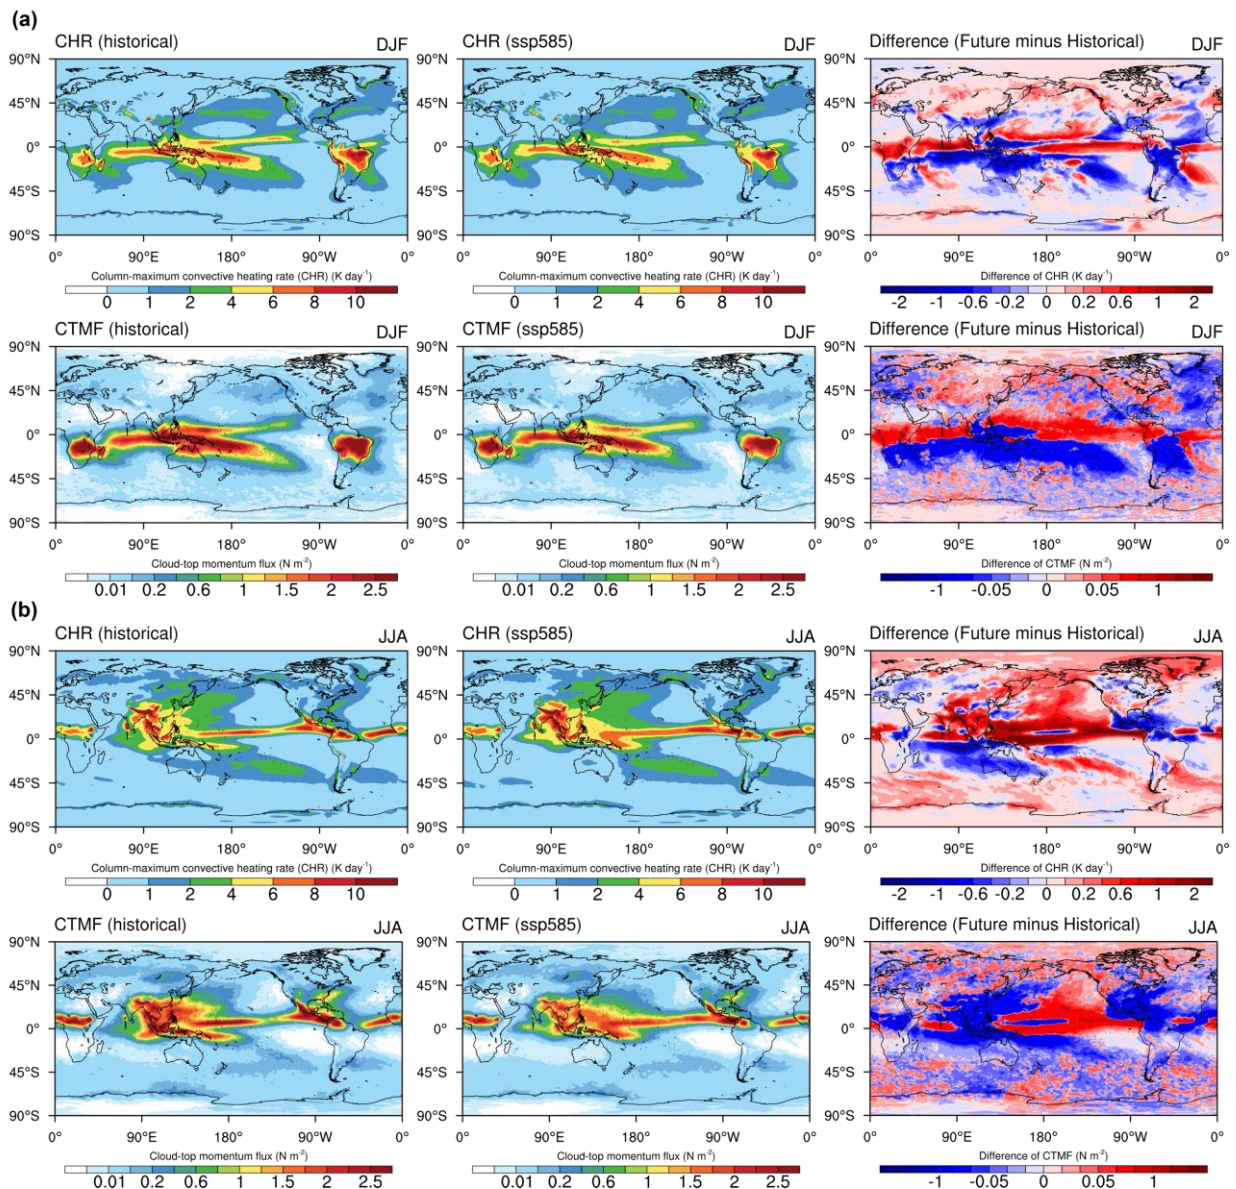

**Supplementary Figure 1. Column-maximum convective heating rate and cloud-top momentum flux of convective gravity waves obtained from historical and SSP5-8.5 experiments.** The 45-year averaged column-maximum convective heating rate (CHR) and convective gravity wave cloud-top momentum flux (CTMF) for (a) DJF and (b) JJA. The leftmost and middle panels show the historical (1970-2014) and high-emissions (2056-2100) experiments, respectively. The rightmost panel shows the difference inferred from SSP5-8.5 minus historical experiments.



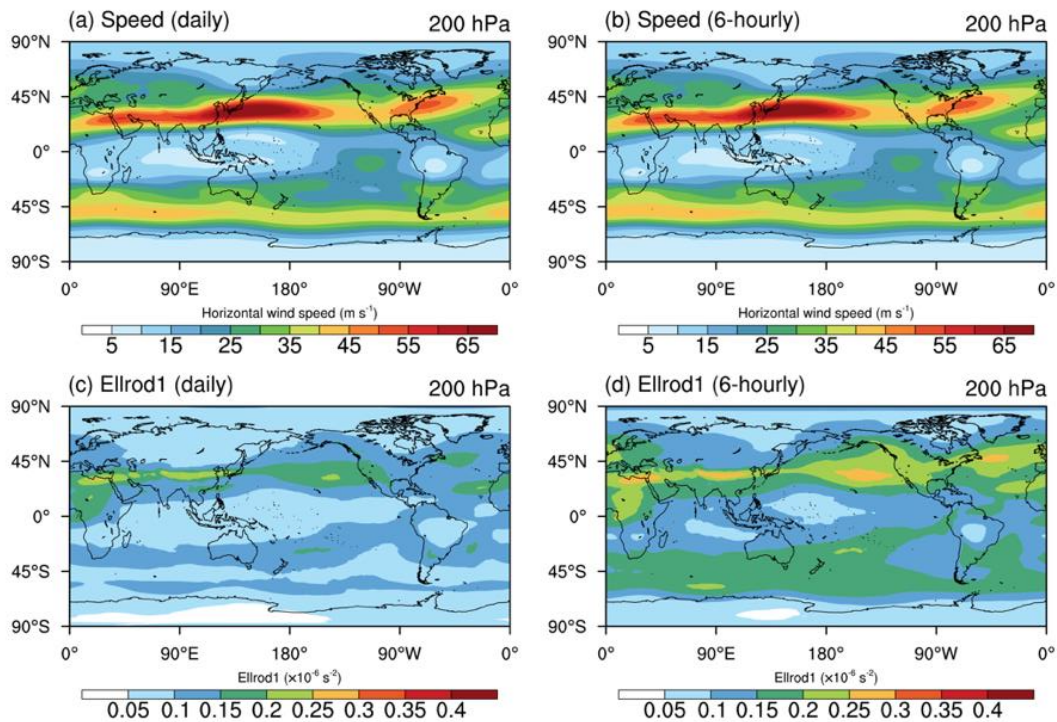

**Supplementary Figure 3. The 45-year (2056-2100) averaged horizontal wind speed and the Ellrod1 index at 200 hPa for DJF.** The 45-year averaged (a,b) horizontal wind and (c,d) Ellrod1 index at 200 hPa for DJF are computed using (a,c) the daily-mean data and (b,d) the 6-hourly data for the high-emissions (2056-2100) experiments.

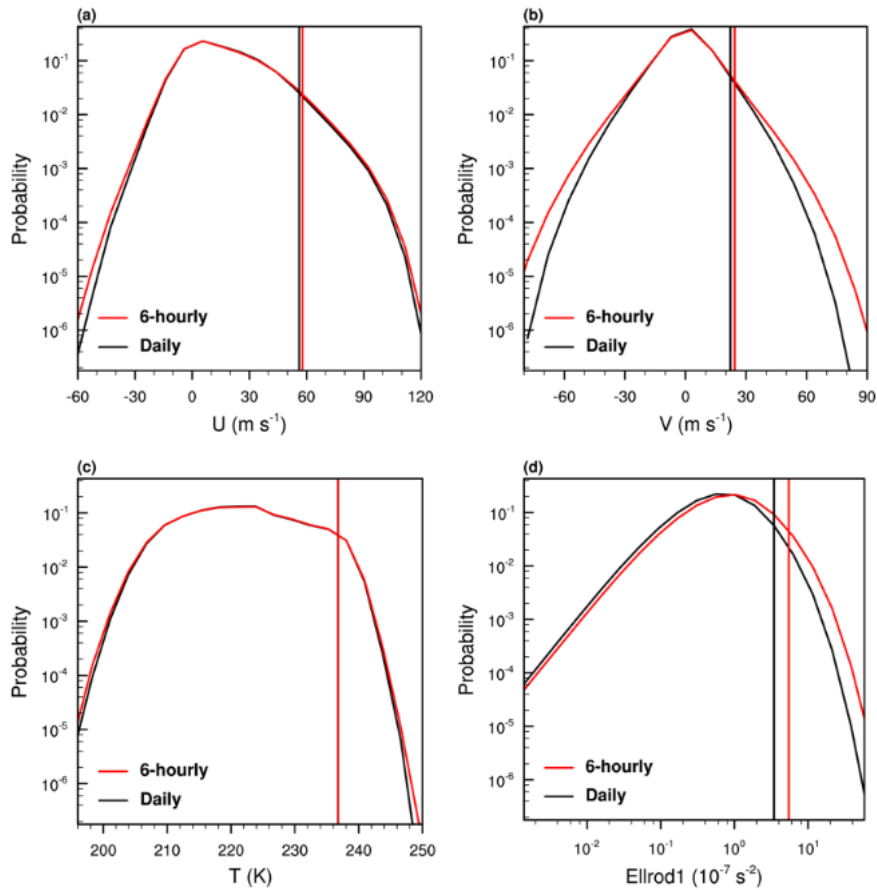

**Supplementary Figure 4. Probability distributions of meteorological variables and the Ellrod1 index.** The global probability distributions of (a) zonal wind, (b) meridional wind, (c) air temperature, and (d) Ellrod1 index between 200 and 250 hPa computed using (black) daily-mean and (red) 6-hourly data for 45 years (2056-2100) of the high-emission experiments. The 98th percentile is represented as a vertical line.
